# Supplementary material for: Biocompatible shape-memory poly(propylene carbonate)/silk fibroin blend with body temperature responsiveness
Source: Royal Society of Chemistry journal article supplement (doi:10.1039/d3ra00670k), 2023-01-01
Supplement: d3ra00670k1.pdf [file d3ra00670k1.pdf]

## **Biocompatible shape-memory poly(propylene carbonate)/silk fibroin blend with body temperature responsiveness**

*Meiyu Cao<sup>a,b</sup>, Bingbing Zeng<sup>a,b</sup>, Yu Zheng<sup>a,b,c\*</sup>, Shaoyun Guo<sup>a,b</sup>*

*<sup>a</sup> The State Key Laboratory of Polymer Materials Engineering, Polymer Research Institute of Sichuan University, Chengdu 610065, Sichuan, China*

*<sup>b</sup> Sichuan Provincial Engineering Laboratory of Plastic/Rubber Complex Processing Technology, Chengdu 610065, Sichuan, China*

*<sup>c</sup> Xinjin Dachuan Intelligent Manufacturing Incubation Center, Chengdu 611430, Sichuan, China*

*Meiyu Cao and Bingbing Zeng contributed equally to this work*

*\*Corresponding author, E-mail address: zy1990@scu.edu.cn (Yu Zheng)*

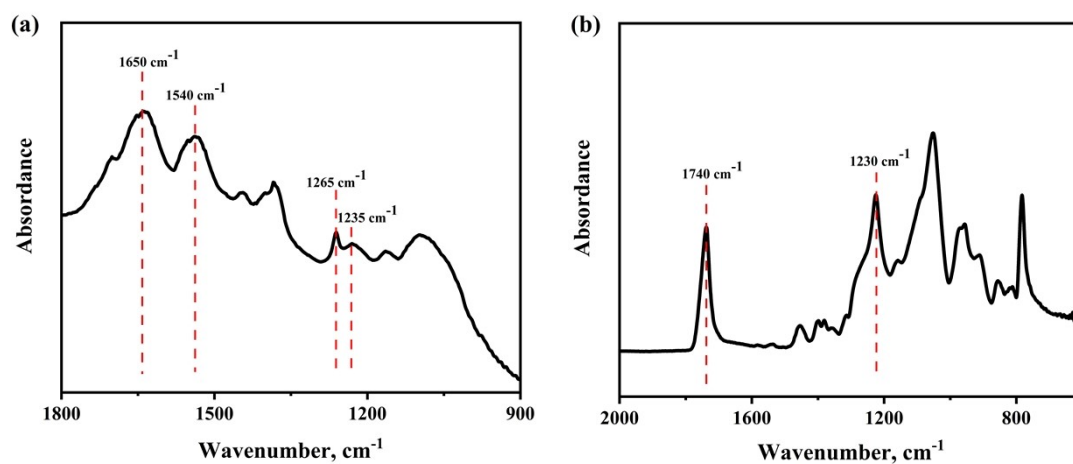

**Fig. S1** FTIR spectroscopy of the (a) SF and (b) PPC.

**Video S1** showing the comparative shape recovery efficiency of PPC and the PPC-3 blend in a water bath at  $37 \text{ }^{\circ}\text{C}$  (MP4)
